# Supplementary material for: In Situ Electrospun Porous MIL-88A/PAN Nanofibrous Membranes for Efficient Removal of Organic Dyes
Source: MDPI journal article supplement (doi:10.3390/molecules28020760), 2023-01-12
Supplement: s1 [file s1]

## **Supplementary Materials**

**In situ electrospun porous MIL-88A/PAN  
nanofibrous membranes for efficient removal of  
organic dyes**

### Preparation of pure MIL-88A powder

MIL-88A powder was synthesized according to a previously reported method[S1]. Typically,  $\text{FeCl}_3 \cdot 6\text{H}_2\text{O}$ , Fumaric acid, and N-N dimethylformamide were added to a 100 ml PTFE lined autoclave. The autoclave was covered and kept at 100 °C for 24 h to obtain a red crystal. The synthesized MOF crystals were extracted in DMF and ethanol for 12 h, and then dried under vacuum at 90 °C for 24 h to obtain MIL-88A powder.

### Preparation of in situ MIL-88A/PAN (iMIL-88A/PAN) NFM

Solution A was obtained by dissolving 1.0 g PAN in 9 ml DMF. Then 1.01 g fumaric acid was added to 10 ml DMF, and 2.11 g  $\text{FeCl}_3 \cdot 6\text{H}_2\text{O}$  was added after dissolution, and B liquid was obtained after stirring evenly. The spinning solution was obtained by mixing liquid A and liquid B in A ratio of 1:1 (v/v). The electrospinning voltage is 25 kV, and the feed speed is 0.4 ml/h. keep a 15 cm distance between the rotating drum and the tip of the syringe. The resulting nanofiber membrane were soaked in methanol for 3 days and dried overnight at 100 °C in a vacuum oven.

### Preparation of blended MIL-88A/PAN (bMIL-88A/PAN) NFM

1.0 g PAN was dissolved in 9 ml of DMF and 1.7 g MIL-88A particles were dispersed in the solution via sonication. The obtained solution was electrospun at a voltage of 25 kV with a feeding rate of 0.4 mL/h. A distance of 15 cm was applied between the rotating drum and the syringe tip. The obtained fiber membrane was soaked in methanol for 3 days and dried at 100 °C in a vacuum oven overnight.

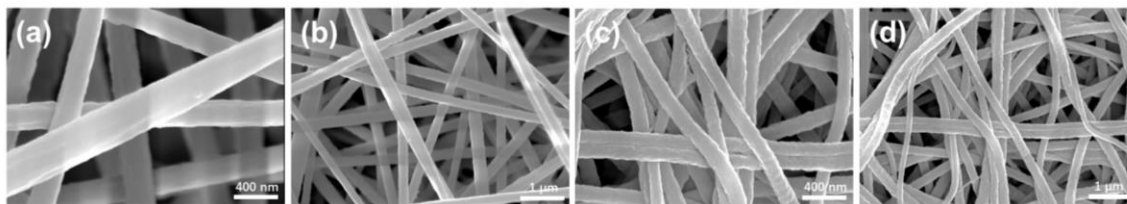

Figure S1. Scanning electron microscopy (SEM) images of the PAN/PVP NFM with different scale bars: (a) 400 nm and (b) 1 μm. SEM images of porous PAN (pPAN) NFM with different scale bars: (c) 400 nm and (d) 1 μm.

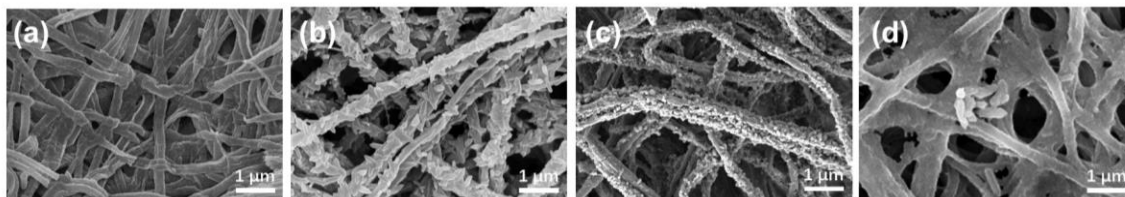

Figure S2. SEM images of the pMIL-88A/PAN NFMs under different feeding rates: (a) 0.8 mL/h, (b) 0.6 mL/h, (c) 0.4 mL/h, and (d) 0.2 mL/h.

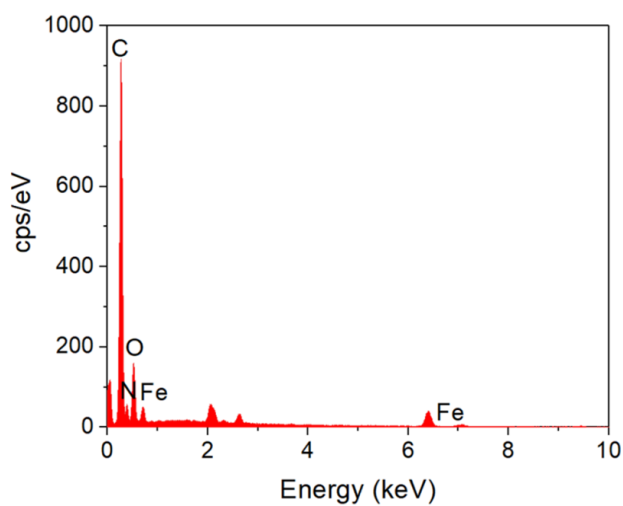

Figure S3. EDS spectrum of pMIL-88A/PAN NFM.

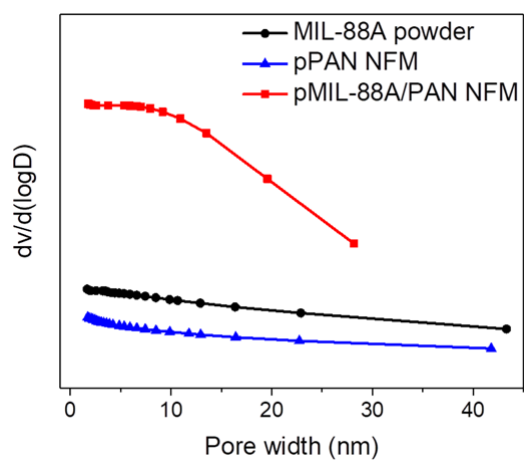

Figure S4. Pore size distributions of the MIL-88A powder, pPAN and pMIL-88A/PAN NFMs.

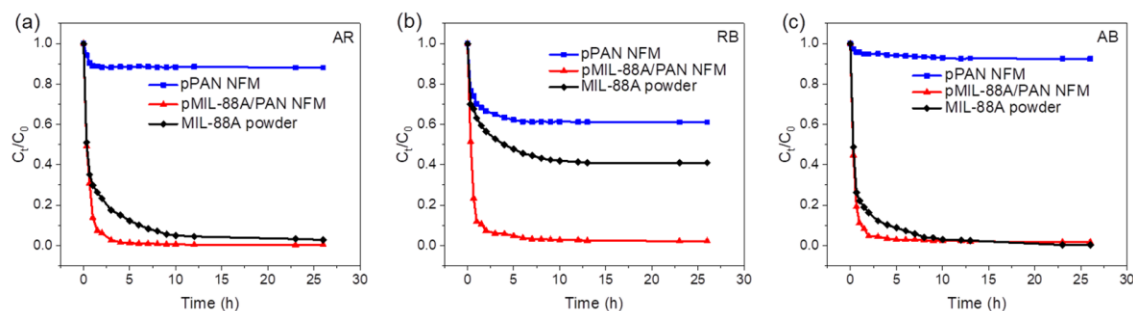

Figure S5. Dye removal rates of pPAN NFM, pMIL-88A/PAN NFM, and pure MIL-88A powder for AR (a), RB (b), and AB (c).

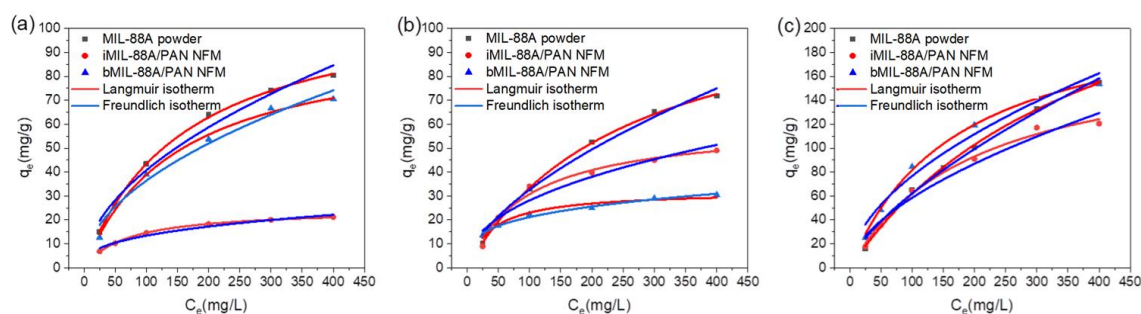

Figure S6. Adsorption isotherms of AR (A), RB (B), and AB (C) by different adsorbents (dye concentration: 25-400 mg/L, adsorbent dosage: 0.4 mg/ml)

Table S1. Calculated results of the Langmuir and Freundlich models for the adsorption of AR, RB, and AB by MIL-88A powder, iMIL-88A/PAN and bMIL-88A/PAN NFMs.

| Dye | sample           | Langmuir isotherm |          |         | Freundlich isotherm |          |         |
|-----|------------------|-------------------|----------|---------|---------------------|----------|---------|
|     |                  | qmax (mg/g)       | b (L/mg) | R2      | KF                  | n        | R2      |
| AR  | MIL-88A powder   | 114.03            | 0.00615  | 0.99927 | 3.61509             | 1.90041  | 0.97199 |
|     | iMIL-88A/PAN NFM | 24.63             | 0.1467   | 0.99906 | 2.57019             | 2.7818   | 0.96204 |
|     | bMIL-88A/PAN NFM | 97.76             | 0.0061   | 0.99499 | 3.43355             | 1.9499   | 0.97303 |
| RB  | MIL-88A powder   | 119.30            | 0.00389  | 0.99909 | 2.05537             | 1.66589  | 0.97949 |
|     | iMIL-88A/PAN NFM | 60.65             | 0.0103   | 0.99419 | 3.8093              | 2.3024   | 0.91032 |
|     | bMIL-88A/PAN NFM | 32.19             | 0.02519  | 0.99735 | 6.0013              | 3.651634 | 0.98315 |
| AB  | MIL-88A powder   | 309.45            | 0.00249  | 0.99787 | 2.79859             | 1.4848   | 0.98956 |
|     | iMIL-88A/PAN NFM | 186.75            | 0.00496  | 0.99124 | 4.20935             | 1.7495   | 0.96224 |
|     | bMIL-88A/PAN NFM | 223.23            | 0.00577  | 0.99744 | 6.34243             | 1.84699  | 0.96721 |

## Reference

- [S1] Xue, B.; Du, L.; Jin, J.; Meng, H.; Mi, J. In situ growth of MIL-88A into polyacrylate and its application in highly efficient photocatalytic degradation of organic pollutants in water. APPL. SURF. SCI. 2021. 564 150404.
